# Supplementary material for: Sustainable Microbial and Heavy Metal Reduction in Water Purification Systems Based on PVA/IC Nanofiber Membrane Doped with PANI/GO
Source: MDPI journal article supplement (doi:10.3390/polym14081558), 2022-04-11
Supplement: s1 [file s1]

# Sustainable microbial and heavy metal reduction in water purification systems based on PVA/IC nanofiber membrane doped with PANI/GO

**Noha A. Ellessawy<sup>\*1</sup>, Marwa H. Gouda<sup>2</sup>, Mohamed Elnouby<sup>3</sup>, Safaa M. Ali<sup>4</sup>, M. Salerno<sup>5,\*</sup>, M. Elsayed Youssef<sup>1</sup>**

<sup>1</sup> Computer Based Engineering Applications Dept., Informatics Research Institute IRI, City of Scientific Research & Technological Applications (SRTA-City), 21934 Alexandria, Egypt.

E. mail: [nonv\\_essawy@yahoo.com](mailto:nonv_essawy@yahoo.com) , [elsayed168@gmail.com](mailto:elsayed168@gmail.com)

<sup>2</sup>Polymer Materials Research Department, Advanced Technology and New Materials Research Institute, City of Scientific Research and Technological Applications (SRTA-City), New Borg El-Arab City, 21934 Alexandria, Egypt.

E. mail: [marwagouda777@yahoo.com](mailto:marwagouda777@yahoo.com)

<sup>3</sup> Nanomaterials and Composites Research Department, Advanced Technology and New Materials Research Institute, City of Scientific Research and Technological Applications (SRTA-City), New Borg El-Arab City, 21934 Alexandria, Egypt.

E. mail: [m\\_nano2050@yahoo.com](mailto:m_nano2050@yahoo.com)

<sup>4</sup>Nucleic Acid Research Department, Genetic Engineering and Biotechnology Research Institute (GEBRI), City of Scientific Research and Technological Applications (SRTA-City), New Borg El-Arab City, 21934 Alexandria, Egypt.

E. mail: [Safaa.mohamedali@yahoo.com](mailto:Safaa.mohamedali@yahoo.com)

<sup>5</sup>Institute for Materials Science and Max Bergmann Center of Biomaterials, TU Dresden, 16163 Dresden, Germany

E. mail: [marco.salerno@tu-dresden.de](mailto:marco.salerno@tu-dresden.de)

**Table S1:** The Box-Behnken design matrix and results for the three variables that influenced the removal (%) of experimental and predicted values for Cd (II) and Pb (II), using the prepared membrane at solution pH 6.

| Trial | Time<br>(X1;<br>min) | Adsorbate<br>initial<br>concentration<br>(X2; mg/L) | Membrane<br>area<br>(X3; cm <sup>2</sup> ) | Removal (%) |        |           |        |
|-------|----------------------|-----------------------------------------------------|--------------------------------------------|-------------|--------|-----------|--------|
|       |                      |                                                     |                                            | Measured    |        | Predicted |        |
|       |                      |                                                     |                                            | Cd(II)      | Pb(II) | Cd(II)    | Pb(II) |
| 1     | 90 (0)               | 50 (-1)                                             | 12.5 (-1)                                  | 75.8        | 93.0   | 79.7      | 92.4   |
| 2     | 90 (0)               | 150 (1)                                             | 12.5 (-1)                                  | 61.4        | 79.1   | 64.2      | 79.9   |
| 3     | 90 (0)               | 50 (-1)                                             | 37.5 (1)                                   | 95.3        | 99.2   | 92.5      | 98.4   |
| 4     | 90 (0)               | 150 (1)                                             | 37.5 (1)                                   | 90.9        | 96.1   | 87.1      | 96.7   |
| 5     | 60 (-1)              | 50 (-1)                                             | 25 (0)                                     | 88.6        | 92.1   | 88.5      | 93.1   |
| 6     | 60 (-1)              | 150 (1)                                             | 25 (0)                                     | 74.0        | 86.9   | 74.9      | 86.5   |
| 7     | 120 (1)              | 50 (-1)                                             | 25 (0)                                     | 93.0        | 98.9   | 92.1      | 99.3   |
| 8     | 120 (1)              | 150 (1)                                             | 25 (0)                                     | 84.6        | 92.6   | 84.7      | 91.6   |
| 9     | 60 (-1)              | 100 (0)                                             | 12.5 (-1)                                  | 75.1        | 82.9   | 71.4      | 82.5   |
| 10    | 60 (-1)              | 100 (0)                                             | 37.5 (1)                                   | 88.3        | 96.6   | 91.2      | 96.4   |
| 11    | 120 (1)              | 100 (0)                                             | 12.5 (-1)                                  | 83.0        | 90.4   | 80.1      | 90.6   |
| 12    | 120 (1)              | 100 (0)                                             | 37.5 (1)                                   | 92.1        | 99.3   | 95.9      | 99.7   |
| 13    | 90 (0)               | 100 (0)                                             | 25 (0)                                     | 91.4        | 97.2   | 91.4      | 97.2   |

**Table S2:** Regression statistics of Cd removal.

|                          |          |
|--------------------------|----------|
| <b>Multiple R</b>        | 0.959743 |
| <b>R Square</b>          | 0.921107 |
| <b>Adjusted R Square</b> | 0.684426 |
| <b>Standard Error</b>    | 5.558102 |
| <b>Observations</b>      | 13       |

**Table S3:** ANOVA of Cd removal process.

|                   | <b>Df</b> | <b>SS</b> | <b>MS</b> | <b>F</b> | <b>Significance F</b> |
|-------------------|-----------|-----------|-----------|----------|-----------------------|
| <b>Regression</b> | 9         | 1082.039  | 120.2266  | 3.891773 | 0.145428              |
| <b>Residual</b>   | 3         | 92.6775   | 30.8925   |          |                       |
| <b>Total</b>      | 12        | 1174.717  |           |          |                       |

**TableS4:** Regression statistics of Pb removal.

|                          |          |
|--------------------------|----------|
| <b>Multiple R</b>        | 0.995425 |
| <b>R Square</b>          | 0.99087  |
| <b>Adjusted R Square</b> | 0.963481 |
| <b>Standard Error</b>    | 1.223043 |
| <b>Observations</b>      | 13       |

**Table S5:** ANOVA of Pb removal process.

|                   | <b>df</b> | <b>SS</b> | <b>MS</b> | <b>F</b> | <b>Significance F</b> |
|-------------------|-----------|-----------|-----------|----------|-----------------------|
| <b>Regression</b> | 9         | 487.0321  | 54.11468  | 36.17695 | 0.006641              |
| <b>Residual</b>   | 3         | 4.4875    | 1.495833  |          |                       |
| <b>Total</b>      | 12        | 491.5196  |           |          |                       |

**Table S6:** Parameters and determination coefficients of the kinetic models for Cd(II) and Pb(II) adsorption on prepared nanofiber membrane.

| Initial concentrations<br>(mgL <sup>-1</sup> ) | 50     |        | 100    |        | 200    |        |
|------------------------------------------------|--------|--------|--------|--------|--------|--------|
|                                                | Cd(II) | Pb(II) | Cd(II) | Pb(II) | Cd(II) | Pb(II) |
| $q_{e,exp}$ (mg g <sup>-1</sup> )              | 245    | 251    | 462    | 486    | 866    | 907    |
| <u>Pseudo-1<sup>st</sup>-order</u>             |        |        |        |        |        |        |
| $q_{e,cal}$ (mg g <sup>-1</sup> )              | 56     | 39.6   | 187    | 233    | 327    | 465    |
| $k_1$ (min <sup>-1</sup> )                     | 0.035  | 0.026  | 0.039  | 0.024  | 0.034  | 0.029  |
| $R^2$                                          | 0.93   | 0.96   | 0.96   | 0.97   | 0.96   | 0.95   |
| <u>Pseudo-2<sup>nd</sup>-order</u>             |        |        |        |        |        |        |
| $q_{e,cal}$ (mg g <sup>-1</sup> )              | 258    | 249    | 472    | 478    | 897    | 915    |
| $k_2$ (min <sup>-1</sup> )                     | 0.0281 | 0.0141 | 0.0102 | 0.0037 | 0.0055 | 0.0034 |
| $R^2$                                          | 0.999  | 0.999  | 0.999  | 0.999  | 0.999  | 0.999  |

**Table S7:** Adsorption isotherm parameters for Cd (II) and Pb (II) adsorption on prepared nanofiber membrane.

| Temperature °C               | 25 °C  |        | 35 °C  |        | 45°C   |        |
|------------------------------|--------|--------|--------|--------|--------|--------|
|                              | Cd(II) | Pb(II) | Cd(II) | Pb(II) | Cd(II) | Pb(II) |
| <u>Langmuir isotherm</u>     |        |        |        |        |        |        |
| $q_m$ (mg g <sup>-1</sup> )  | 1030   | 1078   | 1098   | 1162   | 1149   | 1201   |
| $k_L$ (L mg <sup>-1</sup> )  | 0.11   | 0.29   | 0.16   | 0.36   | 0.31   | 1.39   |
| $R^2$                        | 0.999  | 0.999  | 0.998  | 0.999  | 0.998  | 0.999  |
| <u>Freundlich isotherm</u>   |        |        |        |        |        |        |
| $K_F$ ( mg g <sup>-1</sup> ) | 168    | 264    | 195    | 311    | 269    | 466    |
| $1/n_F$                      | 0.48   | 0.42   | 0.47   | 0.44   | 0.39   | 0.33   |
| $R^2$                        | 0.998  | 0.998  | 0.998  | 0.999  | 0.999  | 0.999  |
